# Supplementary material
Source: PubMed Central journal article supplement (PMC4049184)
Supplement: NIHMS546960-supplement-1.pdf [file NIHMS546960-supplement-1.pdf]

# Supplementary Information

---

---

## Supplementary Figures

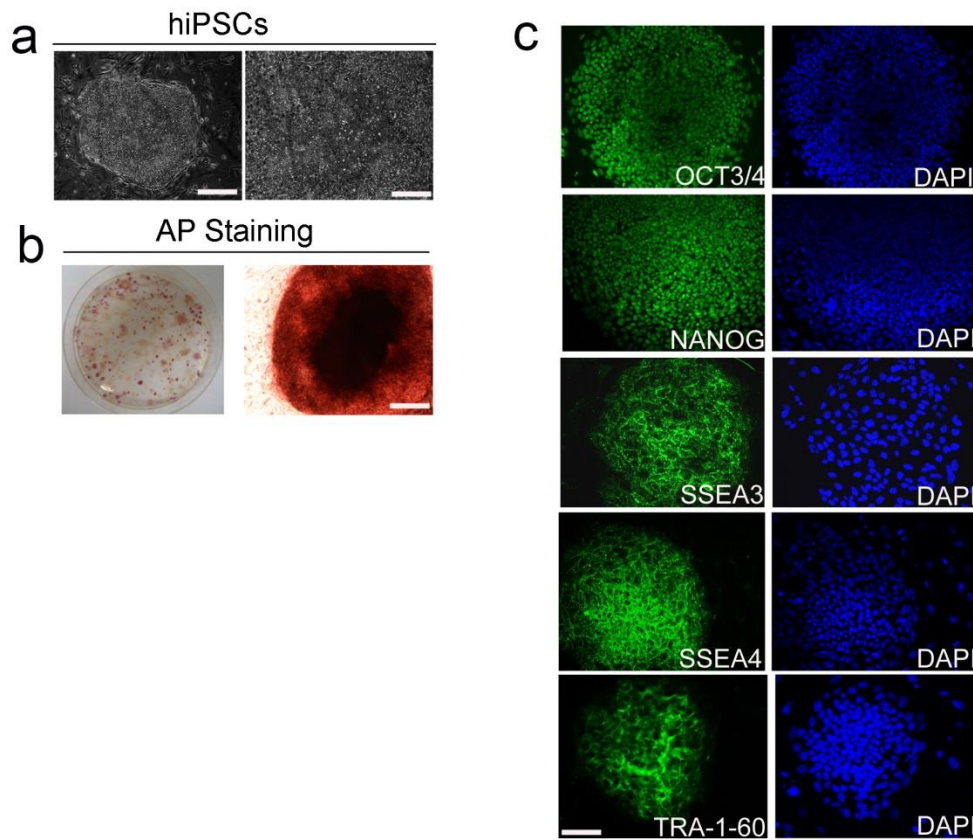

Supplementary Figure 1. Characterization of hiPSCs derived from primary human fibroblasts. a,b. Morphology of hiPSCs. hiPSCs exhibit hESC-like morphology in co-culture with mouse embryonic feeder fibroblasts (Scale bars: left panel, 200 μm; right panel, 50 μm) (a), AP staining of hiPSCs (Scale bars of left panel, 200 μm) (b). c. As shown via immunostaining, hiPSC clones express markers common to pluripotent cells, including OCT3/4, NANOG, SSEA3, SSEA4 and TRA-1-60. 4, 6-Diamidino-2-phenylindole (DAPI) staining indicates cell nuclear. Scale bar, 30 μm.

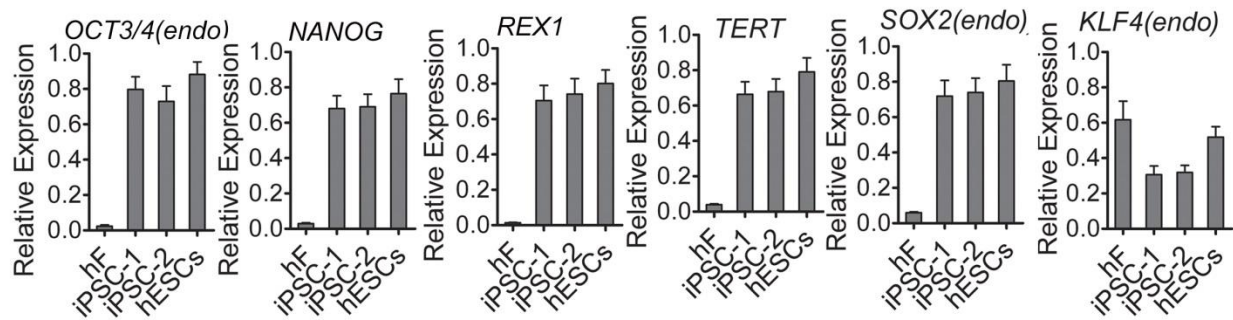

Supplementary Figure 2. Gene expression in hiPSCs is similar to hESCs.

qPCR assay for expression of *OCT3/4(endo)*, *SOX2(endo)*, *NANOG*, *TERT*, *KLF4(endo)* and *REX1* in hESCs, hiPSCs and parental fibroblasts (hFs). Individual PCR reactions were normalized against internal controls ( $\beta$ -actin). Data shown are mean  $\pm$  SD of the expression from three different experiments.

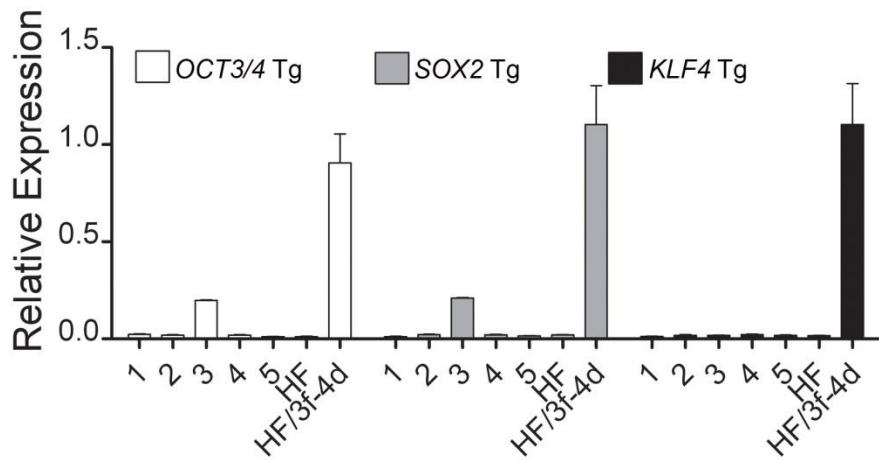

Supplementary Figure 3. qPCR analysis of retroviral transgene expression in the hiPSC clones. Transgene-specific PCR primers permit determination of the relative retrovirally expressed (transgene) genes (*OCT3/4*, *SOX2* and *KLF4*) via qPCR. Tg represents transgene. Five different hiPSC clones were tested. hF stands for human fibroblasts and hF/3f-4d stands for human fibroblasts 4 days after virally infection with *OCT3/4*, *SOX2* and *KLF4*. Data shown are mean  $\pm$  SD of the expression from three different experiments.

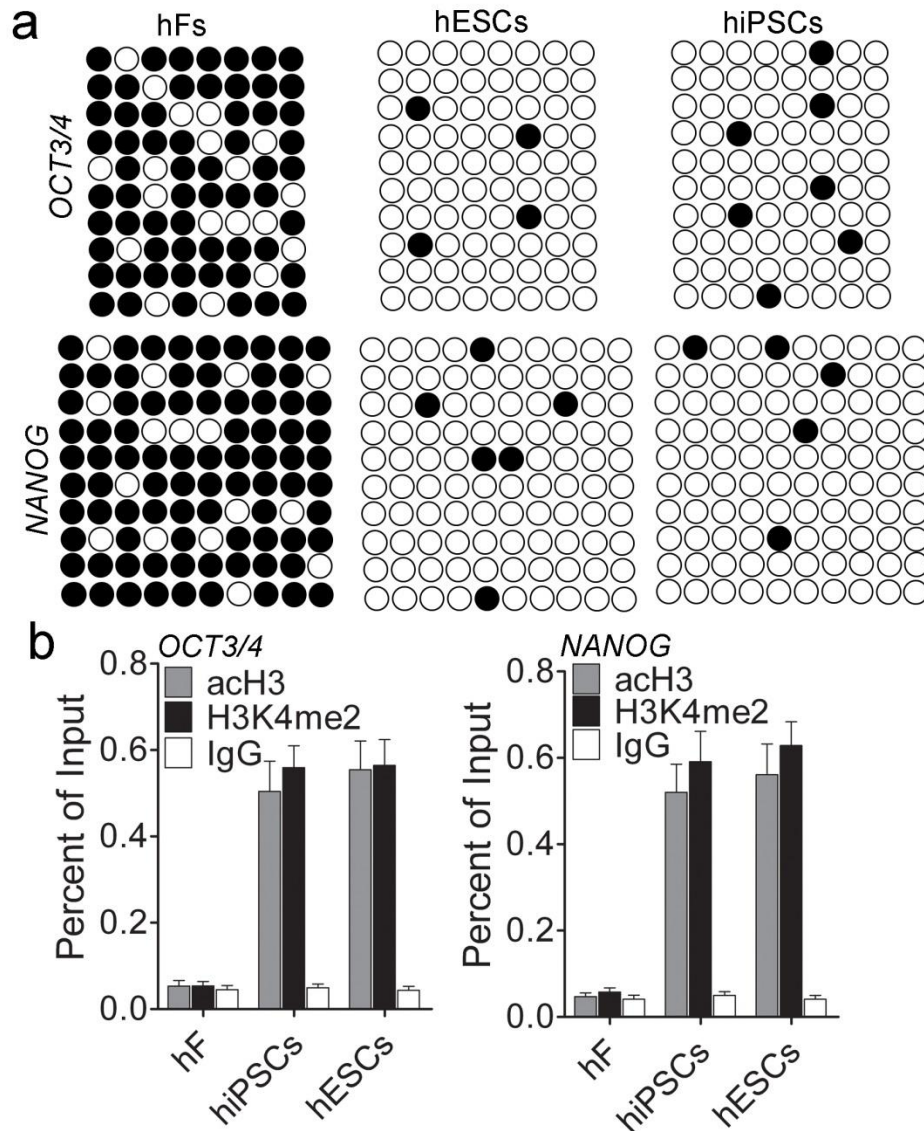

Supplementary Figure 4. Analysis of DNA methylation and histone modification in the *OCT3/4* and *NANOG* promoters in the hiPSCs, hESCs and hFs.

a. Bisulfite genomic sequencing of the promoter regions of *OCT3/4* and *NANOG* in 10 randomly selected hiPSC and hESC clones, as well as human fibroblasts (hFs). Open circles indicate unmethylated CpG dinucleotides, whereas closed circles indicate methylated CpGs. b. Chromatin immunoprecipitation was performed using antibodies against dimethylated histone H3K4 (H3K4me2) and H3 acetylation (acH3). *OCT3/4* and *NANOG* promoters showed enrichment for the active (H3K4me2 and acH3) mark in hiPSCs, similar to hESCs. In hFs, *OCT3/4* and *NANOG* promoters appeared in the inactive state. Data shown are mean  $\pm$  SD of histone modification from three independent experiments.

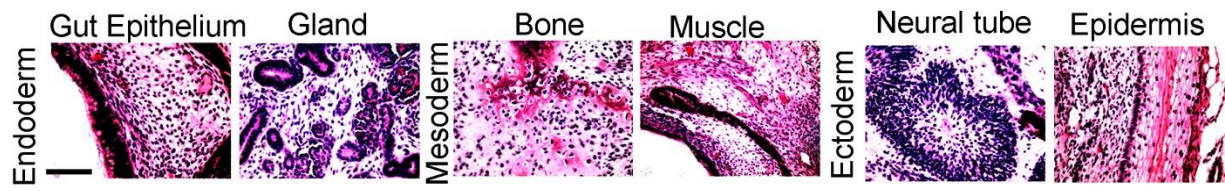

Supplementary Figure 5. Pluripotent characterization of hiPSCs.

hiPSCs were injected into immunodeficient mouse and generated well-differentiated teratoma-like masses containing all three embryonic germ layers (endoderm, mesoderm and ectoderm). Scale bar, 50  $\mu$ m.

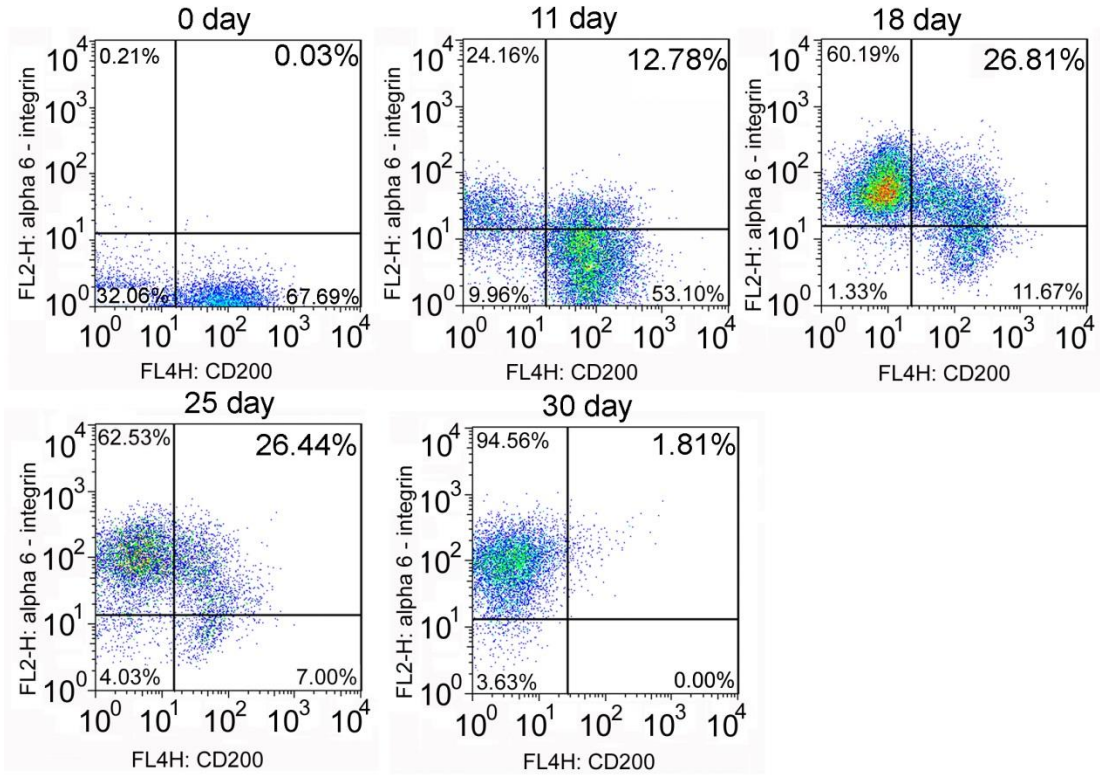


---

Day1-  
BMP4
Day3-  
EGF(10 ng/ml)

Supplementary Figure 6. Flow cytometric analysis of positive cells for CD200 and ITGA6 during epithelial cell differentiation from hiPSCs. Flow cytometric analysis was performed using antibodies specific for CD200 and ITGA6. CD200<sup>+</sup>/ITGA6<sup>+</sup> cell percentage was monitored at 0, 11, 18, 25 and 30 days respectively.

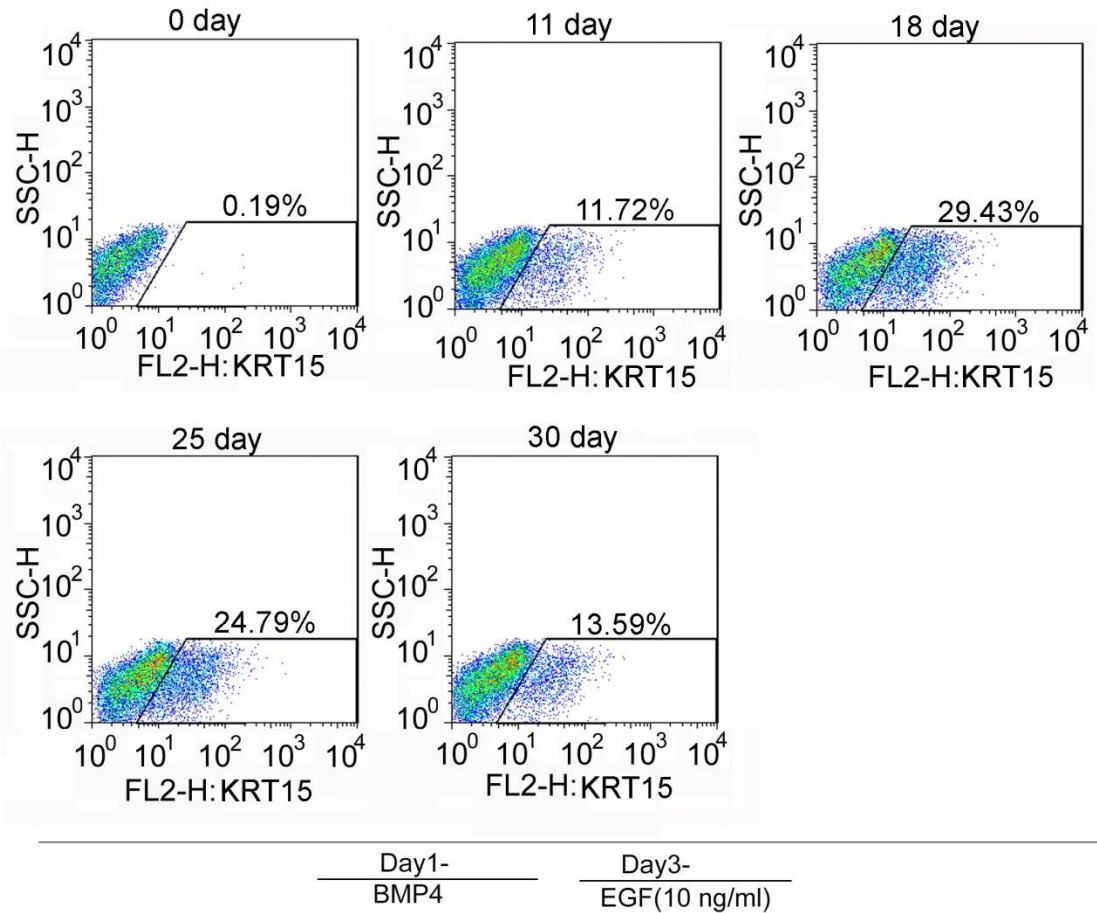

Supplementary Figure 7. Flow cytometric analysis of positive cells for KRT15 during epithelial cell differentiation from hiPSCs.

Flow cytometric analysis was performed using antibody specific for KRT15 and KRT15<sup>+</sup> cell percentage was monitored at 0, 11, 18, 25 and 30 days respectively.

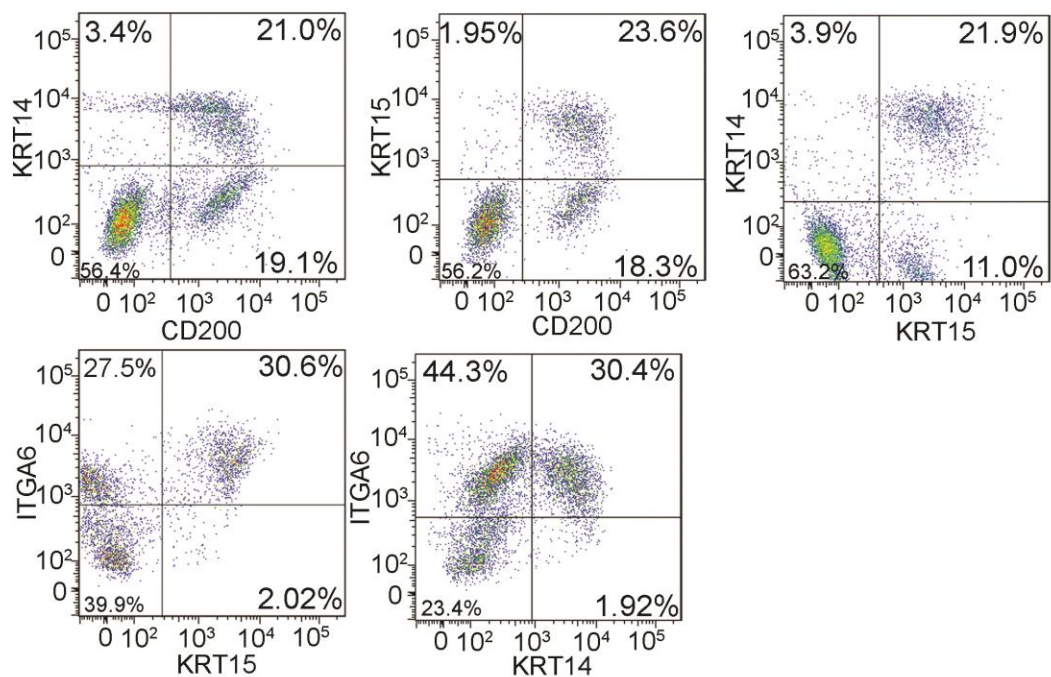

Supplementary Figure 8. Flow cytometric analysis of the percentage of CD200<sup>+</sup>/KRT15<sup>+</sup>, CD200<sup>+</sup>/KRT14<sup>+</sup>, ITGA6<sup>+</sup>/KRT15<sup>+</sup>, ITGA6<sup>+</sup>/KRT14<sup>+</sup> and KRT14<sup>+</sup>/KRT15<sup>+</sup> cell populations at day 18 during the epithelial cell differentiation.



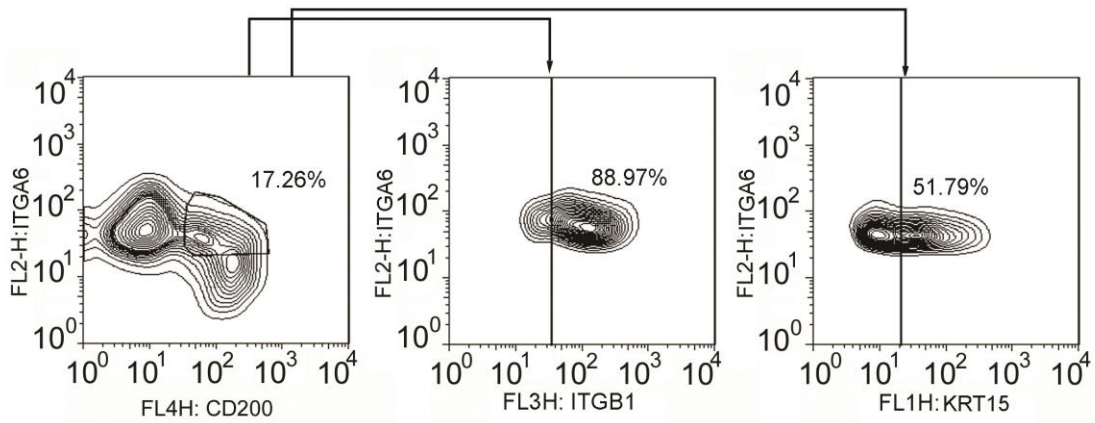

Supplementary Figure 9. Flow cytometric analysis of ITGB1<sup>+</sup> or KRT5<sup>+</sup> cell percentage in CD200<sup>+</sup>/ITGA6<sup>+</sup> cells. CD200<sup>+</sup>/ITGA6<sup>+</sup> cell population was gated out. Almost all the cells expressed ITGB1 and only about 50% cells expressed KRT15.

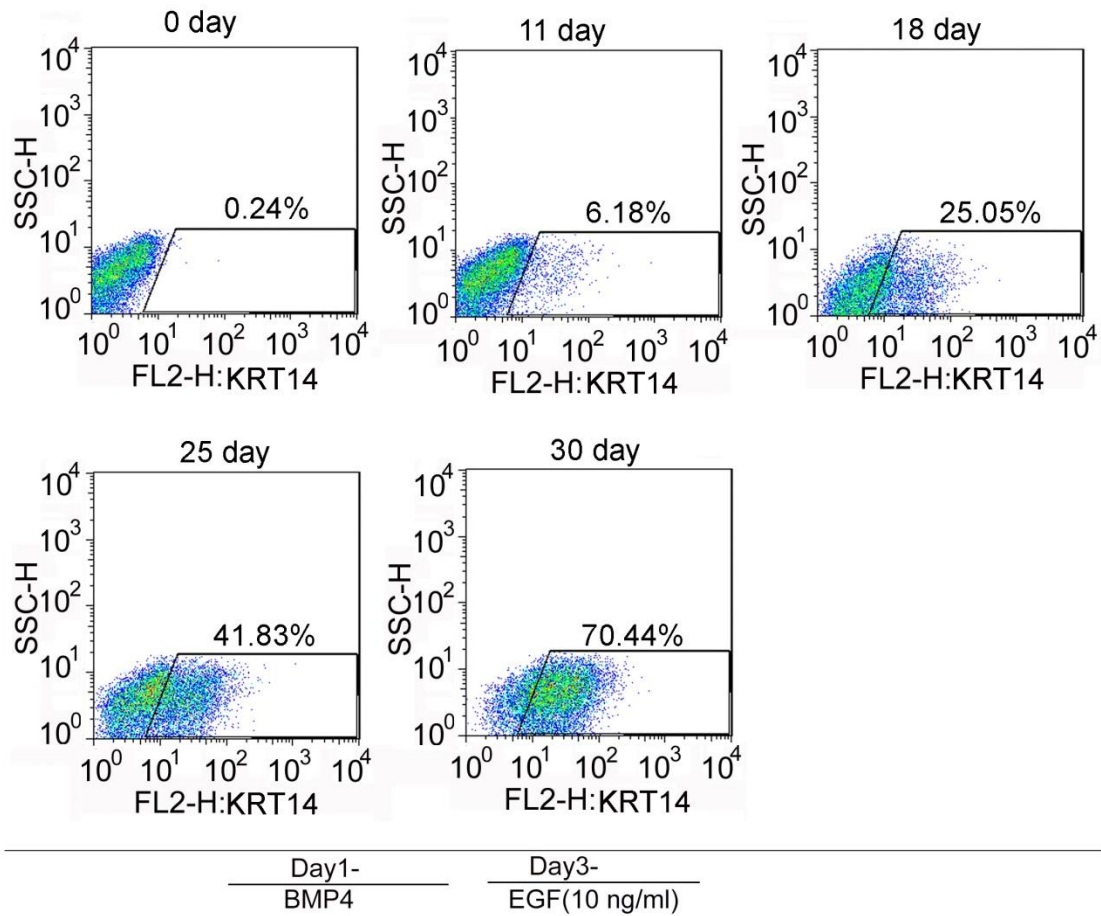

Supplementary Figure 10. Flow cytometric analysis of positive cells for KRT14 during epithelial cell differentiation from hiPSCs.

Flow cytometric analysis was performed using antibody against KRT14 and KRT14<sup>+</sup> cell percentage was monitored at 0, 11, 18, 25 and 30 days respectively.

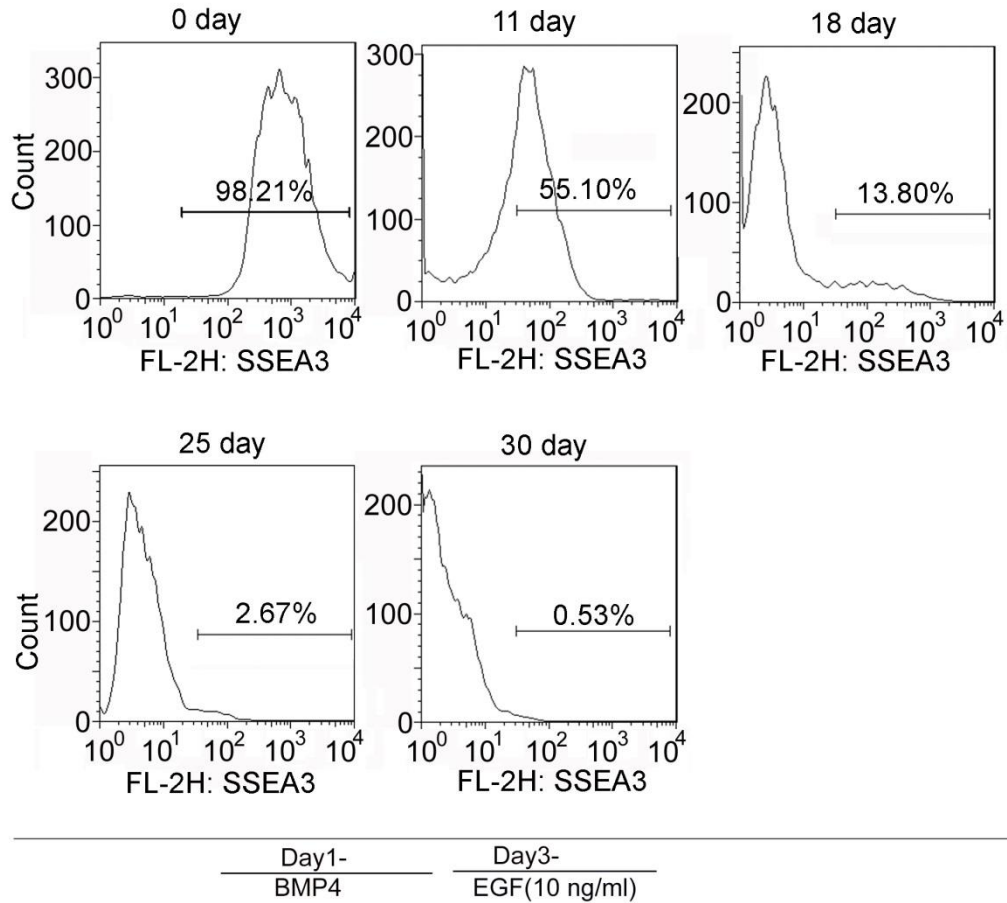

Supplementary Figure 11. Flow cytometric analysis of positive cells for SSEA3 during epithelial cell differentiation from hiPSCs.

Flow cytometric analysis was performed using antibody specific for SSEA3 and SSEA3<sup>+</sup> cell percentage was monitored at 0, 11, 18, 25 and 30 days respectively.

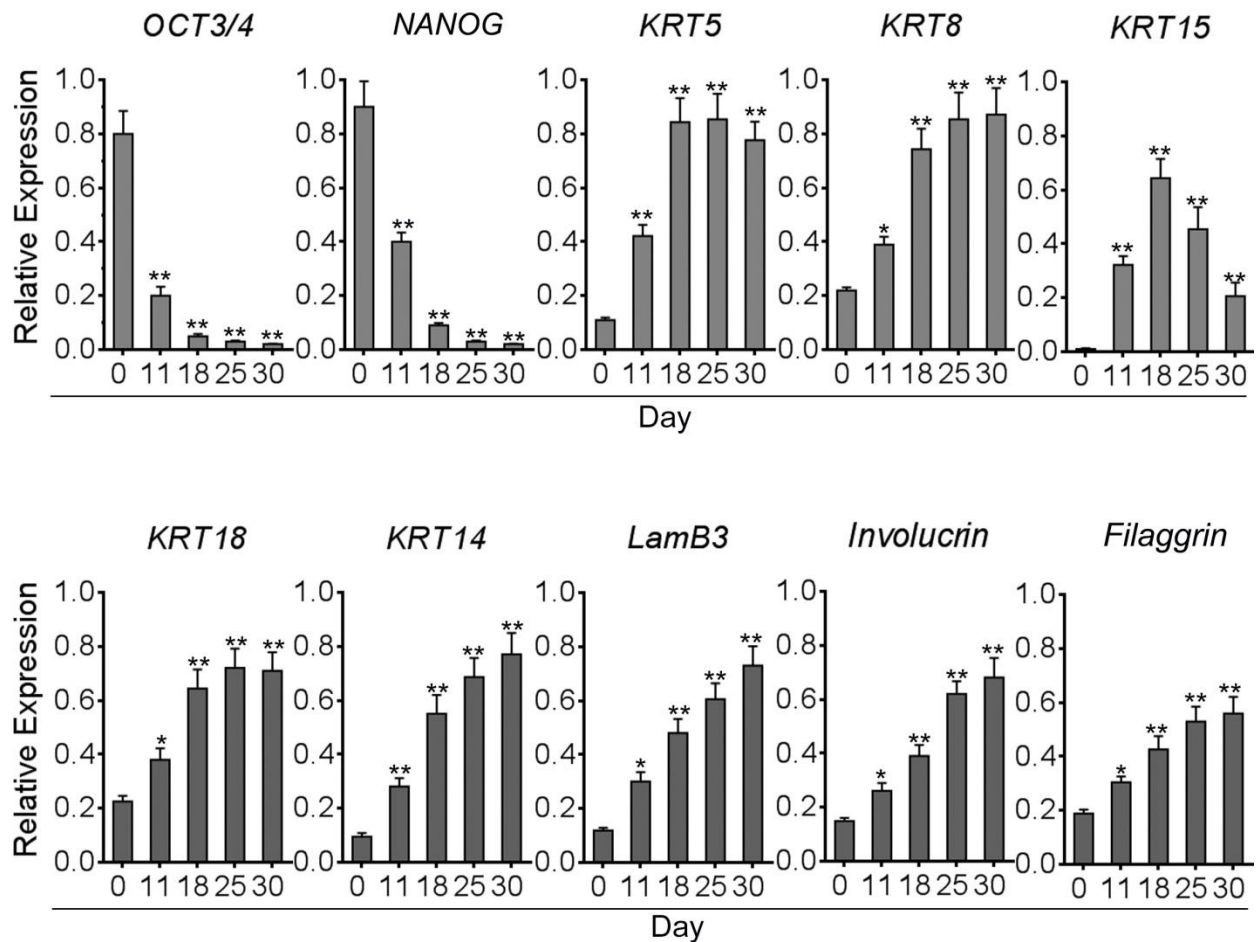

Supplementary Figure 12. qPCR analysis of *OCT3/4*, *NANOG*, *KRT5*, *KRT8*, *KRT14*, *KRT15*, *LamB3*, *Involucrin* and *Filaggrin* in hiPSC-derived cells at different stages of differentiation. Data shown are mean  $\pm$  SD of gene expression from three independent experiments. \* indicates  $p < 0.05$  and \*\* indicates  $p < 0.01$ . One-Way ANOVA was used to calculate the p values. The expression of *OCT3/4* and *NANOG* decreased significantly at day 11, 18, 25 and 30 compared with the expression at day 0. Reversely, the expression of *KRT5*, *KRT8*, *KRT15*, *KRT18*, *KRT14*, *LamB3*, *involucrin* and *filaggrin* increased significantly at day 11, 18, 25 and 30 compared with the expression at day 0. The expression of *KRT15* decreased significantly at day 30 compared with the expression at day 18 ( $P < 0.01$ ). Student's Test was used to calculate the p value.

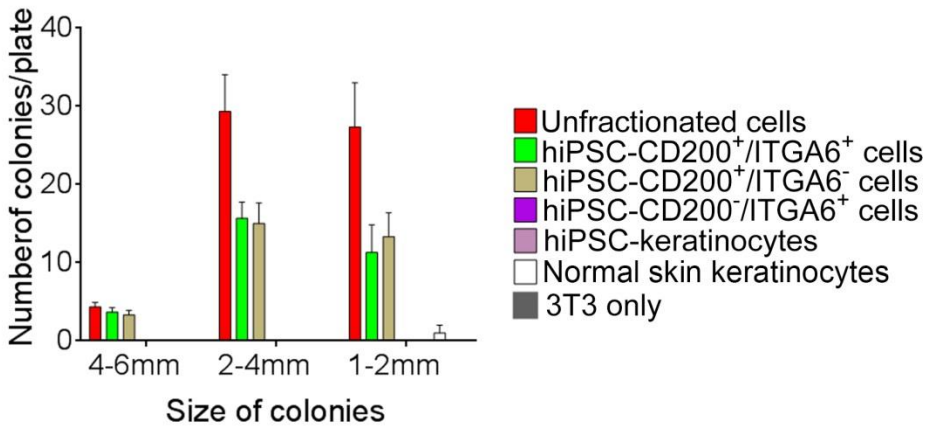

Supplementary Figure 13. Quantification of size and number of colonies from unfractionated cells, CD200<sup>+</sup>/ITGA6<sup>+</sup> cells (hiPSC-CD200<sup>+</sup>/ITGA6<sup>+</sup> cells), CD200<sup>+</sup>/ITGA6<sup>-</sup> cells (hiPSC-CD200<sup>+</sup>/ITGA6<sup>-</sup> cells) and CD200<sup>-</sup>/ITGA6<sup>+</sup> cells (hiPSC-CD200<sup>-</sup>/ITGA6<sup>+</sup> cells) derived from hiPSCs at day 18 differentiation; mature keratinocytes derived from hiPSC (hiPSC-keratinocytes) and normal skin keratinocytes (passage 3). Data shown are mean  $\pm$  SD of the colony numbers from three independent experiments. 3T3 feeder cells used as a negative control.

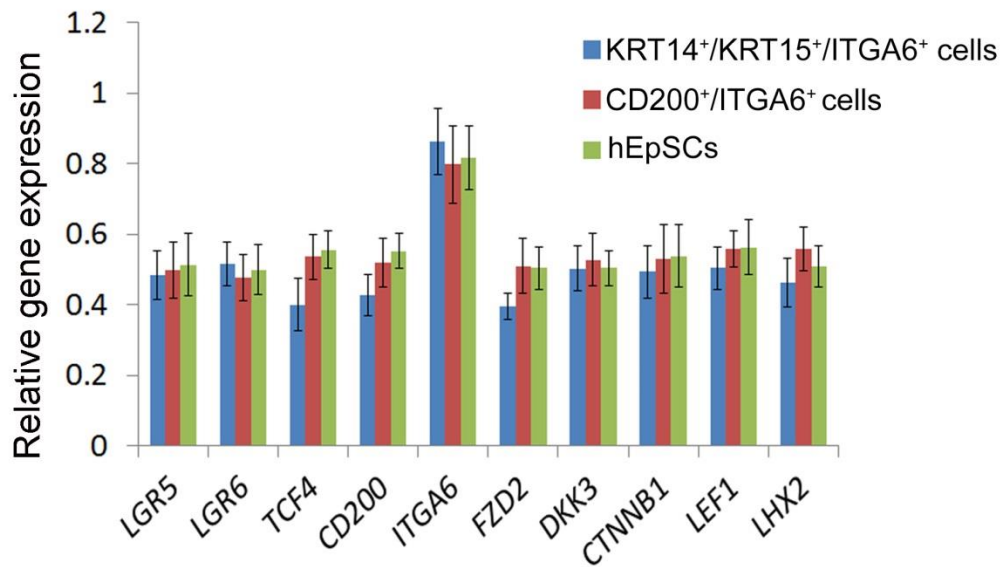

Supplementary Figure 14. qPCR analysis of known EpSC markers, including *LGR5*, *LGR6*, *CD200*, *KRT15*, *ITGA6*, *TCF4*, *FZD2*, *DKK3*, *CTNNB1*, *LEF1* and *LHX2* in KRT14<sup>+</sup>/KRT15<sup>+</sup>/ITGA6<sup>+</sup> cells compared with control CD200<sup>+</sup>/ITGA6<sup>+</sup> cells and hEpSCs. Data shown are mean  $\pm$  SD of the expression from three independent experiments.

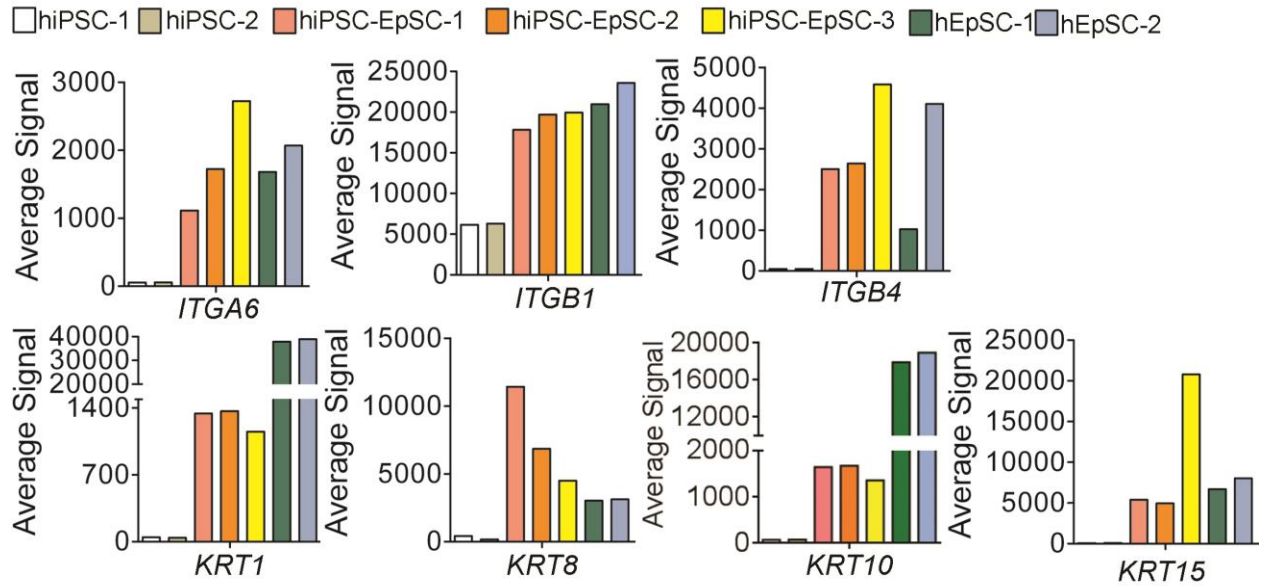

Supplementary Figure 15. Microarray analysis of the expression of *KRT1*, *KRT8*, *KRT10*, *KRT15*, *ITGA6*, *ITGB1* and *ITGB4* in hiPSCs, hiPSC-derived EpSCs and hEpSCs from hair follicles. *KRT1*, *KRT8*, *KRT10*, *KRT15*, *ITGA6*, *ITGB1* and *ITGB4* were selected and the expression data were shown from raw data of microarray.

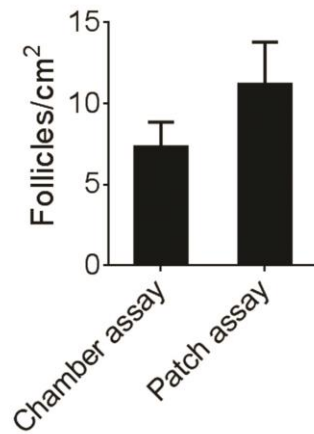

Supplementary Figure 16. Statistical analysis of the densities of hair follicles produced by patch assay and chamber assay using EpSCs derived from hiPSCs and neonatal mouse dermal fibroblasts. Data shown are mean  $\pm$  SD of the hair follicle numbers from three independent experiments in the chamber assay. Data shown are mean  $\pm$  SD of the hair follicle numbers from seven independent experiments in the patch assay.



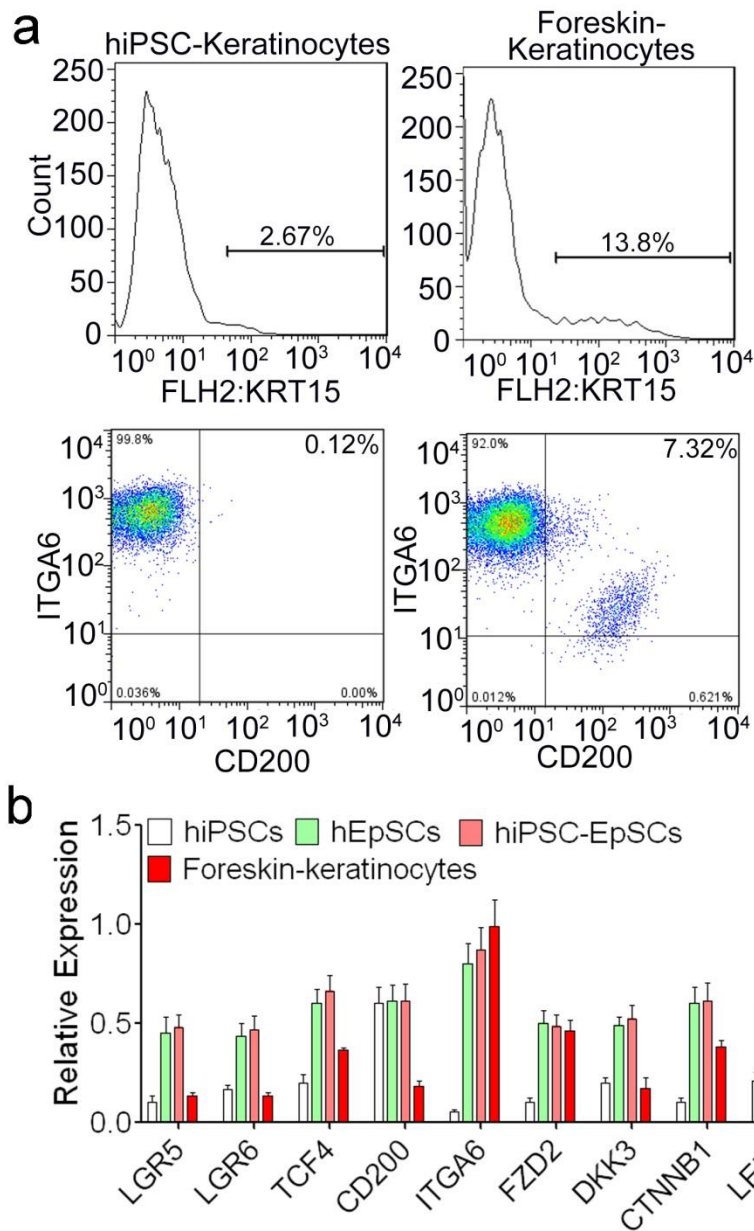

Supplementary Figure 17. a. Flow cytometric analysis of the percentage of CD200<sup>+</sup> and KRT15<sup>+</sup> cells in the neonatal foreskin-derived keratinocytes and hiPSC-derived keratinocytes. b. qPCR analysis of the expression of epithelial markers among hiPSCs, hEpSCs, hiPSC-EpSCs and neonatal foreskin-derived keratinocytes (Foreskin-keratinocytes). Data shown are mean  $\pm$  SD of the expression from three independent experiments.

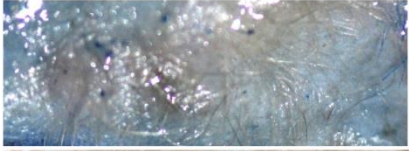

Toluidine blue dissolved in DMSO

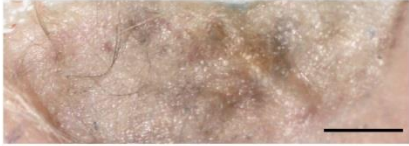

Toluidine blue dissolved in H<sub>2</sub>O

Supplementary Figure 18. Skin permeability assay

Human-like skin in the chamber graft was treated with toluidine blue dissolved in DMSO (up panel) and H<sub>2</sub>O (down panel) respectively. Human-like skin was impermeable to toluidine blue dissolved in H<sub>2</sub>O. Toluidine blue dissolved DMSO permeated into skin and skin was dyed in blue. Scale bar indicates 2mm.

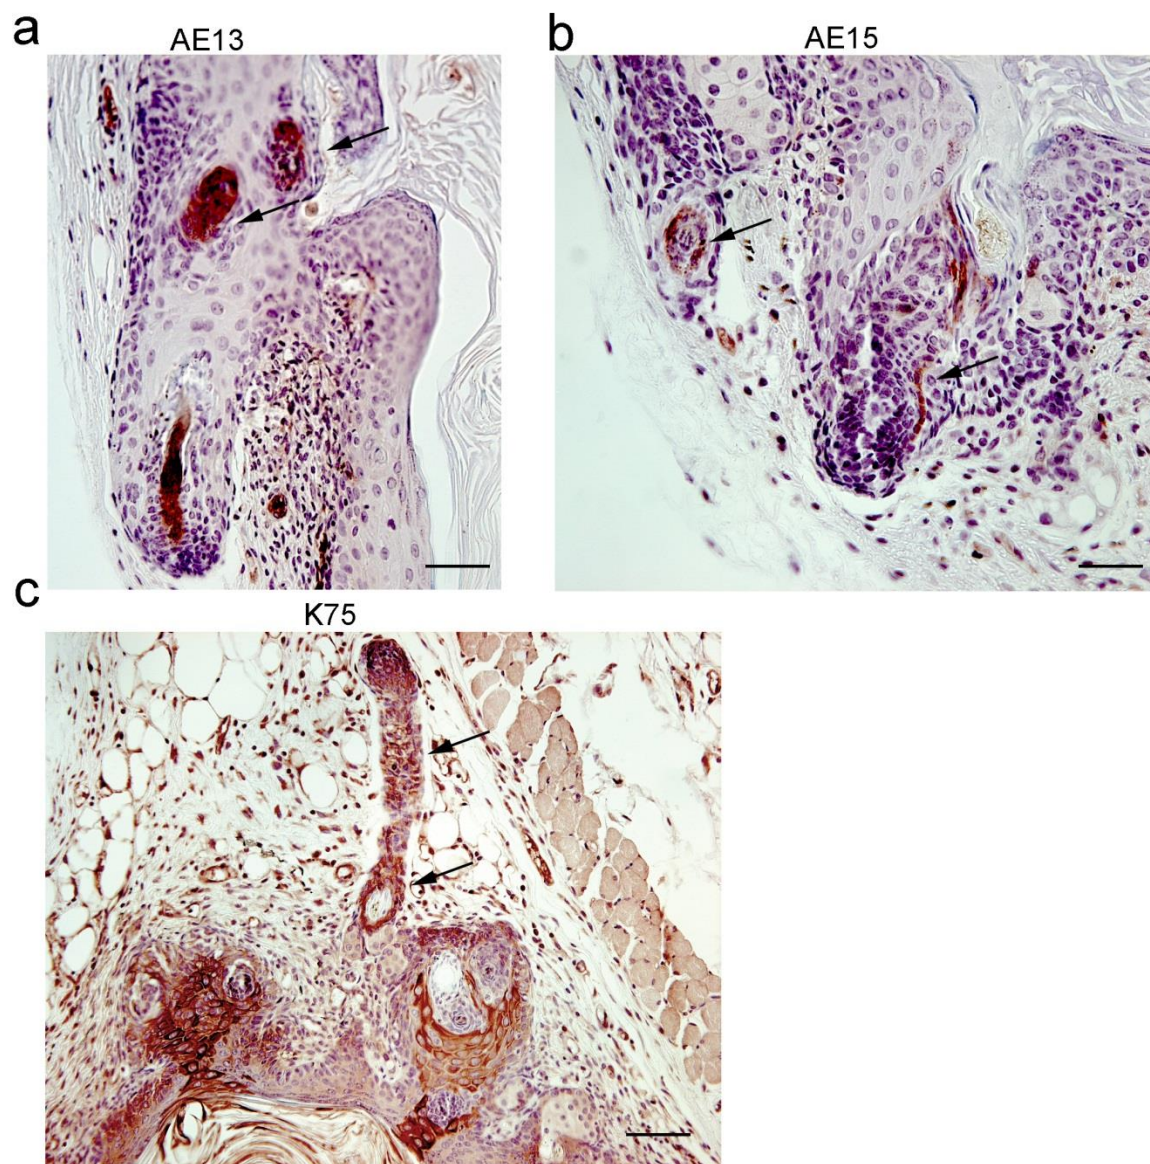

Supplementary Figure 19. Original immunostaining results of AE13 (a), AE15 (b) and K75 (c) in the hair follicle derived from hiPSCs, which are illustrated in Figure 4c, 4d and 4e. Scale bar indicates 50  $\mu$ m (a and b) and 200  $\mu$ m(c).

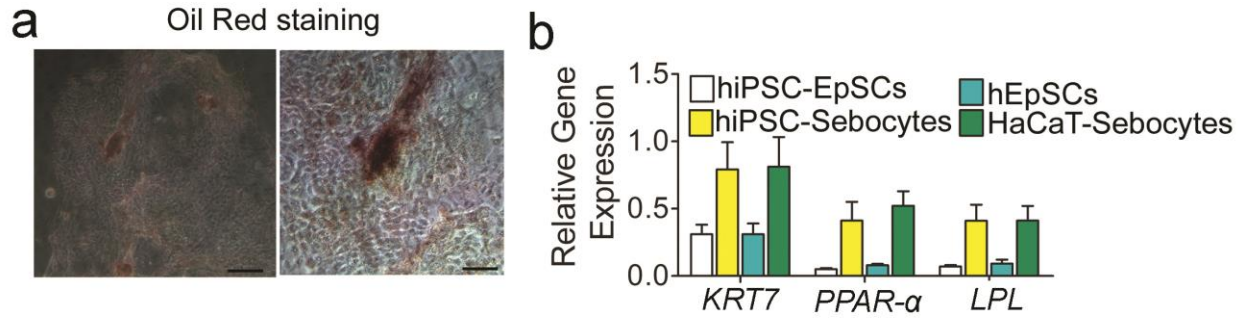

Supplementary Figure 20. Oil red staining of sebocyte and qPCR analysis of sebocyte markers.

a. Sebocytes derived from iPSC-EpSCs were stained with Oil and showed Oil red staining. Scale bar: left panel, 100  $\mu$ m; right panel, 20  $\mu$ m. b. qPCR analysis of sebocyte markers, including *KRT7*, *PPAR- $\alpha$*  and *LPL* in hiPSC-EpSCs, hEpSCs, hiPSC-Sebocytes and HaCaT-Sebocytes. Data shown are mean  $\pm$  SD of the expression from three independent experiments.

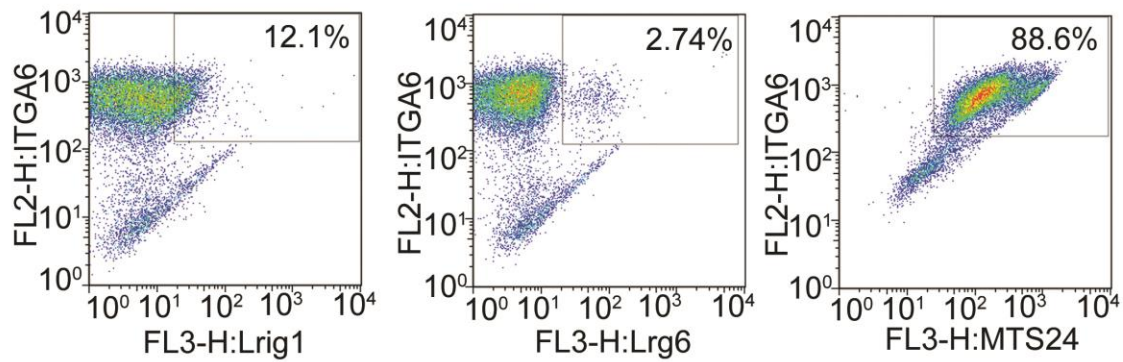

Supplementary Figure 21. Flow cytometric analysis of cells positive for Lrig1<sup>+</sup>/ITGA6<sup>+</sup>, Lrg6<sup>+</sup>/ITGA6<sup>+</sup> or MTS24<sup>+</sup>/ITGA6<sup>+</sup> during epithelial cell differentiation from hiPSCs at day 18. Flow cytometric analysis was performed using antibodies specific for Lrig1, Lrg6, MTS24 and ITGA6. Positive cell percentage was monitored at day 18.

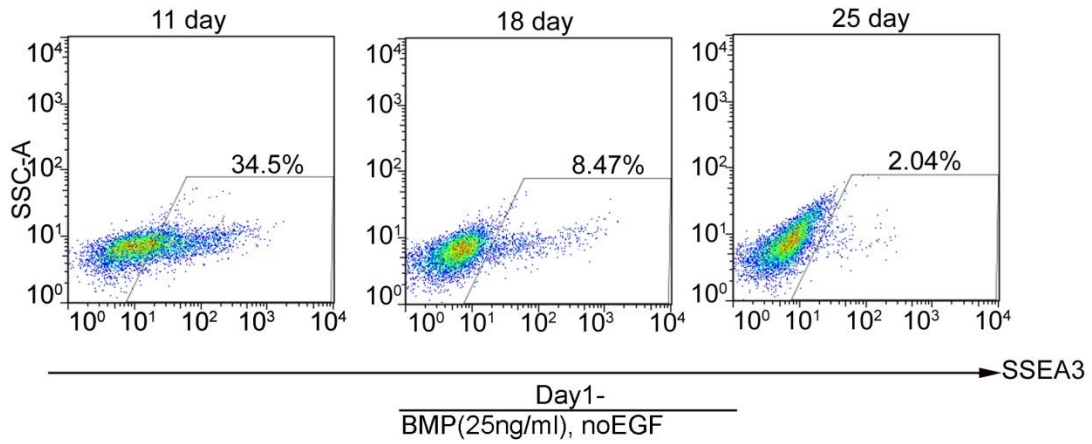

Supplementary Figure 22. Flow cytometric analysis of positive cells for SSEA3 when only BMP4 was added during the differentiation. Flow cytometric analysis was performed using antibody specific for SSEA3. SSEA<sup>+</sup> cell percentage was monitored at 11, 18 and 25 days respectively

Supplementary Tables

Supplementary Table 1 Primer sequences

| Gene           | Forward sequence               | Reverse sequence            | Applications         |
|----------------|--------------------------------|-----------------------------|----------------------|
| ACTB           | TGAAGTGTGACGTGGACATC           | GGAGGAGCAATGATCTTGAT        | RT-PCR               |
| ITGB4          | CTGTACCCGTATTGCGACT            | AGGCCATAGCAGACCTCGTA        | RT-PCR               |
| ITGA6          | GCTGGTTATAATCCTTCAATATCAATTGT  | TTGGGCTCAGAACCTTGTTTT       | RT-PCR               |
| COL7A1         | GATGACCCACGGACAGAGTT           | ACTTCCCGTCTGTGATCAGG        | RT-PCR               |
| LAMB3          | GACAGGACTGGAGAAGCGTGTG         | CCATTGGCTCAGGCTCAGCT        | RT-PCR               |
| KRT5           | ATCTCTGAGATGAACCGGATGATC       | CAGATTGGCGCACTGTTTTCTT      | RT-PCR               |
| KRT14          | GGCCTGCTGAGATCAAAGACTAC        | CACTGTGGCTGTGAGAATCTTGTT    | RT-PCR               |
| KRT8           | GATCGCCACCTACAGGAAGCT          | ACTCATGTTCTGCATCCCAGACT     | RT-PCR               |
| KRT18          | GAGTATGAGGCCCTGCTGAACATCA      | GCGGGTGGTGGTCTTTTGGAT       | RT-PCR               |
| OCT4(endo)     | CCTCACTTCACTGCACTGTA           | CAGGTTTTCTTTCCFTAGCT        | RT-PCR               |
| NANOG          | TGAACCTCAGCTACAAACAG           | TGGTGGTAGGAAGAGTAAAG        | RT-PCR               |
| KLF4(endo)     | GATGAACTGACCAGGCACTA           | GTGGGTCATATCCACTGTCT        | RT-PCR               |
| SOX2(endo)     | CCCAGCAGACTTCACATGT            | CCTCCCATTTCCCTCGTTTT        | RT-PCR               |
| REX1           | TCGCTGAGCTGAAACAAATG           | CCTTCTTGAAGGTTTACAC         | RT-PCR               |
| hTERT          | TGTGCACCAACATCTACAAG           | GCGTTCCTGGCTTTTCAGGAT       | RT-PCR               |
| OCT4 transgene | CCCCAGGGCCCCATTTTGGTACC        | CAACAACCGAAAATGCACCAGCCCCAG | RT-PCR               |
| KLF4 transgene | ACGATCGTGGCCCCGAAAAGGACC       | CAACAACCGAAAATGCACCAGCCCCAG | RT-PCR               |
| SOX2 transgene | GGCACCCCTGGCATGGCTCTTGGCTC     | CAACAACCGAAAATGCACCAGCCCCAG | RT-PCR               |
| Involucrin     | CTCCTCCAGTCAATACCCATCAG        | ACATTCTTGCTCAGGCAGTCC       | RT-PCR               |
| Flaggrin       | TTCGGCAAATCCTGAAGAATC          | CTTGAGCCAACCTGAATACCATC     | RT-PCR               |
| LGR5           | CCTTCCAACCTCAGCGTCTTC          | GGGAATGTATGTCAGAGCGTTTC     | RT-PCR               |
| LGR6           | CACACCCAGTGTCCAGTGTAG          | CCACAGGAAATGCCAGTCAAG       | RT-PCR               |
| TCF4           | CAGCAAGCACTGCCGACTAC           | CCAGGCTGATTCATCCCCT         | RT-PCR               |
| CD200          | TGACTCTGTCTACCCAAATG           | GCTTAGCAATAGCGGAAGT         | RT-PCR               |
| FZD2           | GGACATCGCCTACAACCAGAC          | GCGTACATGGAGCACAGGAAG       | RT-PCR               |
| DKK3           | ACCGAGAAATTCACAAGATAACC        | CTGGCAGGTGTACTGGAAGC        | RT-PCR               |
| LEF1           | CCATCACGGGTGGATTCAG            | TCTGTTTCTGCTGAGGCTTAC       | RT-PCR               |
| LHX2           | ATACCCGAGCAGCCAGAAGAC          | GGAGGACCCGCTTGGTGAG         | RT-PCR               |
| KRT7           | GGACATCGAGATCGCCACCT           | TGCCACCGCCACTGCTACT         | RT-PCR               |
| KRT19          | AACCAAGTTTGAGACGGAACAG         | GAGCGGAATCCACCTCCAC         | RT-PCR               |
| LPL            | TCATTCGCGGAGTAGCAGAGT          | GGCCACAAGTTTTGGCACC         | RT-PCR               |
| PPARA          | TTCGCAATCCATCGGCGAG            | CCACAGGATAAGTCACCGAGG       | RT-PCR               |
| meOCT4         | GAGGTTGGAGTAGAAGGATTGTTTTGGTTT | CCCCCTAACCCTACCTCCACCACCTAA | Bisulfite sequencing |
| meNANOG        | TGGTTAGGTTGGTTTTAAATTTTT G     | AACCCACCCTTATAAATTCTCAATTA  | Bisulfite sequencing |

Supplementary Table 2 Antibody Information

| Antibody Name | Applications        | Dilution | Company       |
|---------------|---------------------|----------|---------------|
| CD200         | Flow Cytometry      | 1:20     | Ebioscience   |
| ITGA6         | Flow Cytometry      | 1:100    | Ebioscience   |
| ITGB4         | Flow Cytometry      | 1:100    | Ebioscience   |
| ITGB1         | Flow Cytometry      | 1:100    | Ebioscience   |
| ITGB4         | Immunofluorescence  | 1:200    | Ebioscience   |
| ITGB1         | Immunofluorescence  | 1:200    | Ebioscience   |
| Krt14         | Immunofluorescence  | 1:1000   | Lab Vision    |
| p67           | Immunofluorescence  | 1:500    | Lab Vision    |
| Krt15         | Immunofluorescence  | 1:500    | Lab Vision    |
| E-CAD         | Immunofluorescence  | 1:40     | Dako          |
| Cytokeratin   | Immunofluorescence  | 1:150    | Dako          |
| SSEA3         | Immunofluorescence  | 1:20     | DSHB          |
| SSEA4         | Immunofluorescence  | 1:20     | DSHB          |
| TR-1-60       | Immunofluorescence  | 1:100    | Santa Cruz    |
| OCT4t         | Immunofluorescence  | 1:100    | Santa Cruz    |
| Nanog         | Immunofluorescence  | 1:100    | Millipore     |
| AE13          | Immunocytochemistry | 1:100    | Abcam         |
| AE15          | Immunocytochemistry | 1:100    | Abcam         |
| K75           | Immunocytochemistry | 1:100    | Sigma-Aldrich |
